# Supplementary material for: Life cycle assessment of a marine biorefinery producing protein, bioactives and polymeric packaging material
Source: Springer Nature journal article supplement (doi:10.1007/s11367-023-02239-w), 2023-10-17

Supplementary Information for:

## Life Cycle Assessment of a Marine Biorefinery Producing Protein, Bioactives and Polymeric Packaging Material.

Lorraine Amponsah,<sup>1,2</sup> Christopher Chuck<sup>2</sup> and Sophie Parsons<sup>3</sup>

<sup>1</sup> Centre for Sustainable & Circular Technologies, University of Bath, Bath, UK

<sup>2</sup> Department of Chemical Engineering, University of Bath, Bath, UK

<sup>3</sup> Ball Beverage Packaging Europe, 100 Capability Green, Luton, UK

### Corresponding Author:

Lorraine Amponsah

[La610@bath.ac.uk](mailto:La610@bath.ac.uk)

+44 (0) 7791133912

### Summary:

This supporting information provides process contribution analysis on the SS and SG scenarios (Figure S1-5); summary of the overall LCIA results (Table S1); summary of literature values used to generate the comparative bar chart displayed in figure 3 (Table S2); and the full range of impact categories considered in the sensitivity analysis, assessing the impact of seaweed carbohydrate content and packaging material market value on overall environmental emissions (Figure S6).

### Contents

|   |                                                                     |    |
|---|---------------------------------------------------------------------|----|
| 1 | Abbreviations.....                                                  | 2  |
| 2 | Contribution Analysis.....                                          | 3  |
|   | Figure S1.....                                                      | 3  |
|   | Figure S2.....                                                      | 3  |
|   | Figure S3.....                                                      | 4  |
|   | Figure S4.....                                                      | 5  |
|   | Figure S5.....                                                      | 6  |
| 3 | Overall life cycle impact assessment results .....                  | 7  |
|   | Table S1.....                                                       | 7  |
| 4 | Comparison of seaweed biopolymer with commercial alternatives ..... | 8  |
|   | Table S2.....                                                       | 8  |
| 5 | Sensitivity analysis .....                                          | 10 |
|   | Figure S6.....                                                      | 10 |

## 1 Abbreviations

The following abbreviations have been used for the ReCiPe midpoint categories:

|      |                                 |     |                           |
|------|---------------------------------|-----|---------------------------|
| GW   | Global warming                  | MEu | Marine eutrophication     |
| FRS  | Fossil resource scarcity        | MRS | Mineral resource scarcity |
| FE   | Freshwater ecotoxicity          | AC  | Acidification             |
| FEu  | Freshwater eutrophication       | TE  | Terrestrial ecotoxicity   |
| HCT  | Human carcinogenic toxicity     | W   | Water consumption         |
| HnCT | Human non-carcinogenic toxicity | LU  | Land use                  |
| ME   | Marine ecotoxicity              |     |                           |

Abbreviations used for the modelled scenarios:

|    |                     |      |                     |
|----|---------------------|------|---------------------|
| EG | Economic allocation | with | Green energy mix    |
| ES | Economic allocation | with | Standard energy mix |
| MG | Mass allocation     | with | Green energy mix    |
| MS | Mass allocation     | with | Standard energy mix |
| SG | System expansion    | with | Green energy mix    |
| SS | System expansion    | with | Standard energy mix |

Abbreviations used for the unit processes comprising the product system:

|    |                      |       |                               |
|----|----------------------|-------|-------------------------------|
| AW | Acid washing         | PP    | Packaging material production |
| BP | Biorefinery products | SD1-3 | Drying 1-3                    |
| DF | Filtration           | SWC   | Seaweed cultivation           |
| M  | Milling              | WW    | Water washing                 |

Abbreviations used for alternative polymers:

|      |                            |     |                      |
|------|----------------------------|-----|----------------------|
| HDPE | High-density polyethylene  | PP  | Polypropylene        |
| LDPE | Low-density polyethylene   | PS  | Polystyrene          |
| PET  | Polyethylene terephthalate | PVC | Polyvinyl chloride   |
| PHA  | Polyhydroxyalkanoates      | TPS | Thermoplastic starch |
| PLA  | Polylactic acid            |     |                      |

## 2 Contribution analysis

**Figure S1** - Graph showing the relative process contributions for scenario SS (system expansion, standard energy) in each of the assessed environmental impact categories.

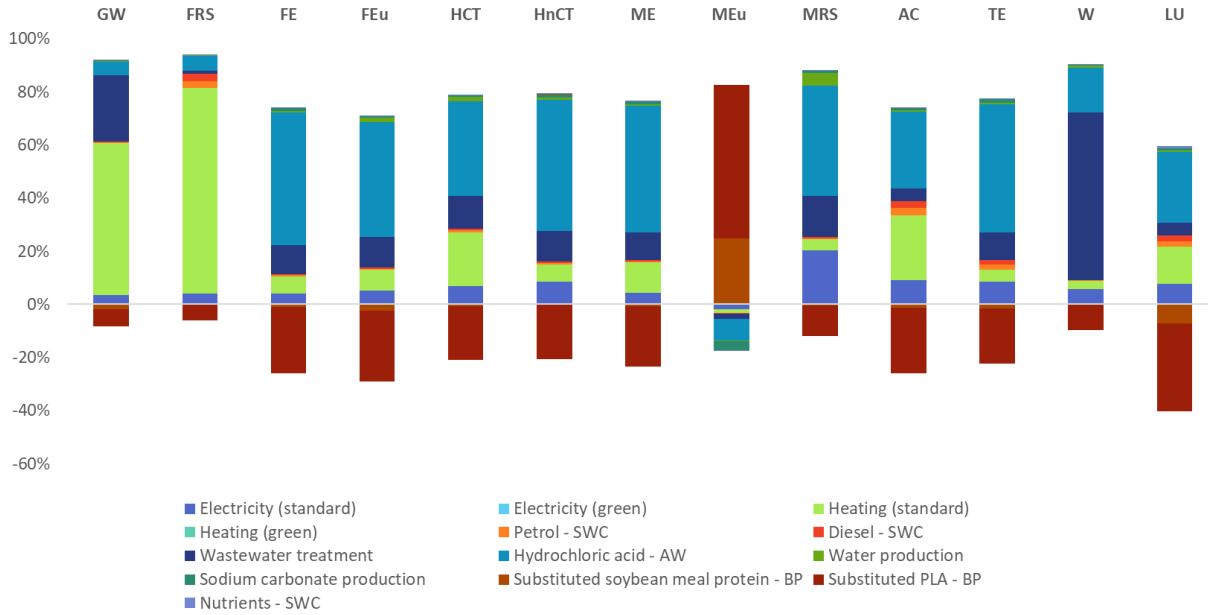

**Figure S2** - Graph showing the relative process contributions for scenario SG (system expansion, green energy) in each of the assessed environmental impact categories.

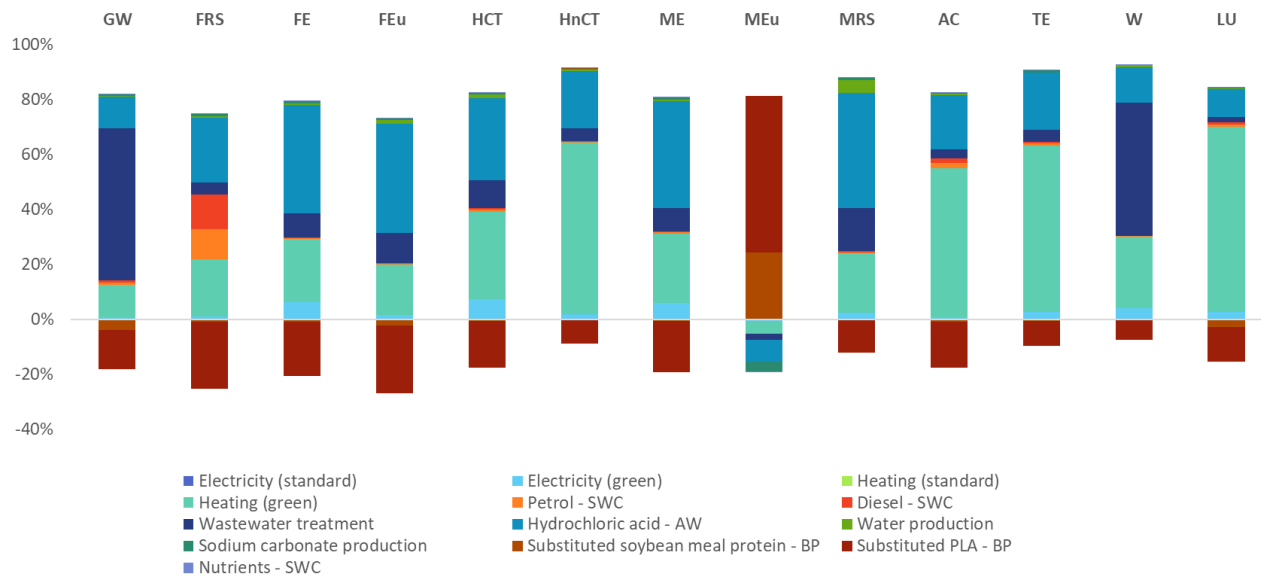

**Figure S3** - Graph showing the overall environmental impacts generated from SS (blue) relative to that generated from SG (green).

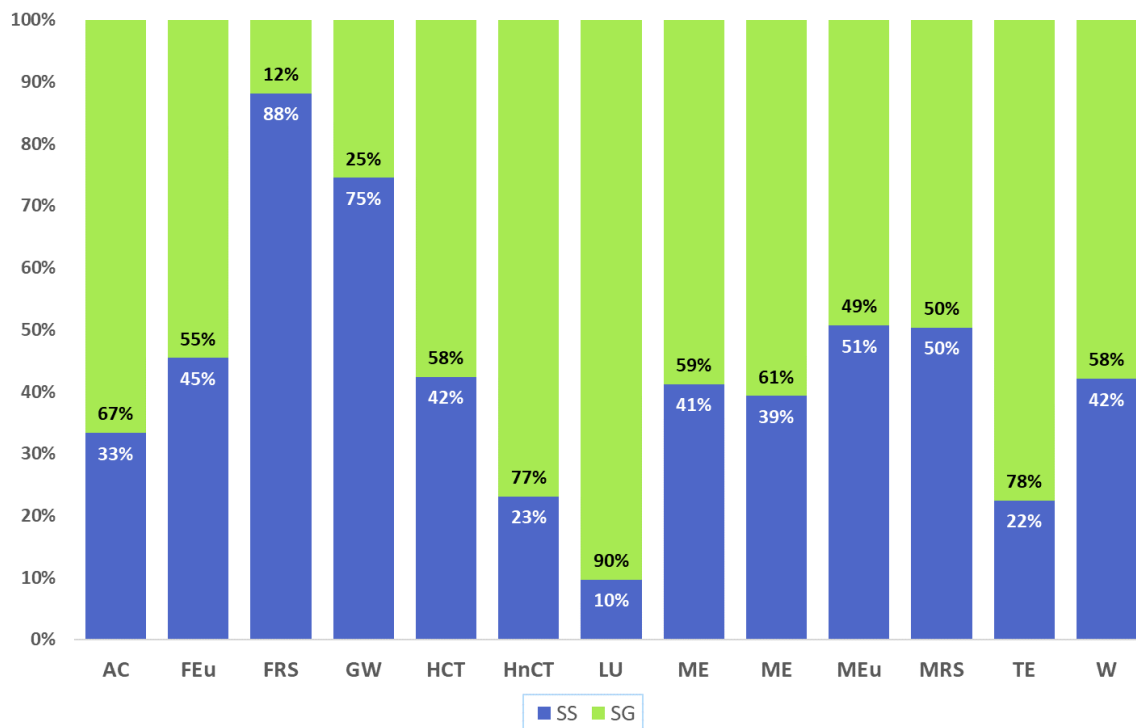

**Figure S4** - Bar charts highlighting the percentage contribution of key activities/processes (namely electricity, heating, water supply, wastewater treatment, nutrients added during the cultivation (nursery phase), petrol and diesel used during cultivation (out-sea growth phase), HCl production, NaOH production, and substituted products PLA and soybean protein) to the overall potential environmental impacts, in the **standard energy scenario (SS)**.

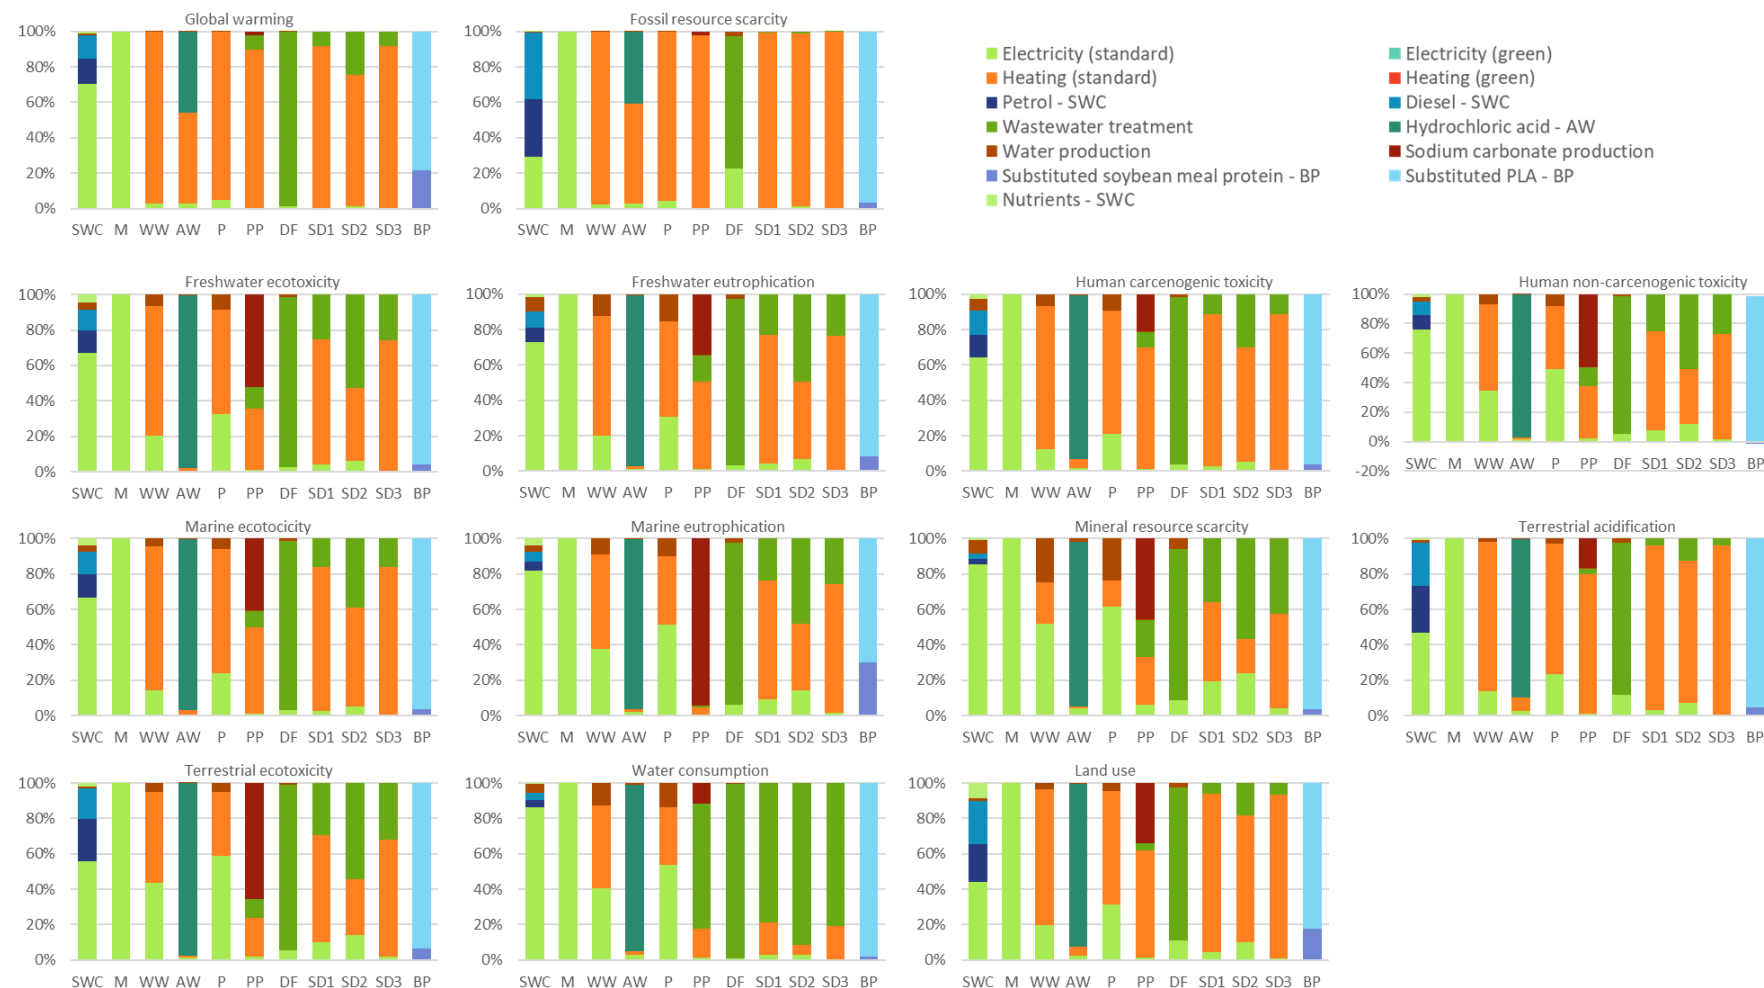

**Figure S5** - Bar charts highlighting the percentage contribution of key activities/processes (namely electricity, heating, water supply, wastewater treatment, nutrients added during the cultivation (nursery phase), petrol and diesel used during cultivation (out-sea growth phase), HCl production, NaOH production, and substituted products PLA and soybean protein) to the overall potential environmental impacts, in the **green energy scenario (SG)**.

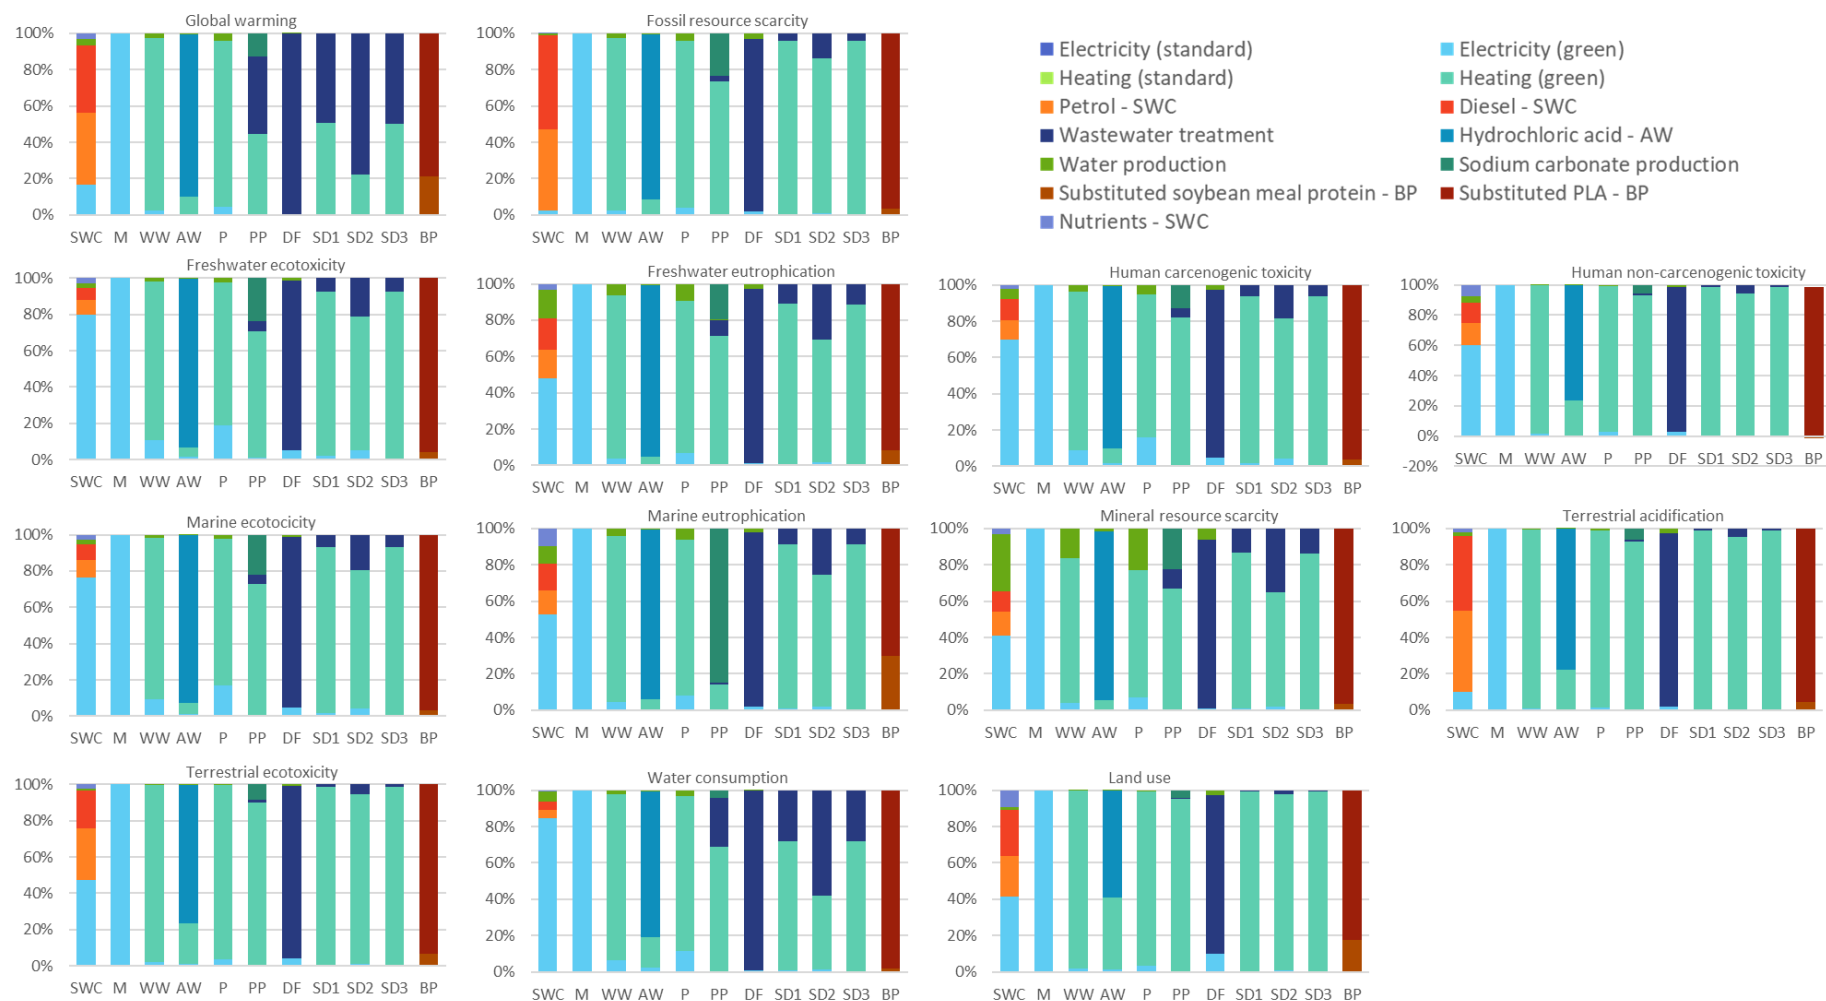

### 3 Overall life cycle impact assessment results

**Table S1** - Summary of the overall LCIA results, across all 18 of the midpoint impact categories made available through the ReCiPe 2016 (Hierarchist) assessment method. Impact values have been reported in reference to the production of 1kg polymeric resin (the functional unit).

| Impact category                         | units        | Scenario |          |           |          |          |           |
|-----------------------------------------|--------------|----------|----------|-----------|----------|----------|-----------|
|                                         |              | MS       | ES       | SS        | MG       | EG       | SG        |
| Stratospheric ozone depletion           | kg CFC11 eq  | 2.70E-06 | 1.30E-06 | -1.67E-06 | 4.96E-06 | 2.49E-06 | 3.81E-06  |
| Ionizing radiation                      | kBq Co-60 eq | 4.09E-01 | 1.03E-01 | 3.02E+00  | 3.84E-01 | 1.35E-01 | 2.09E+00  |
| Ozone formation, Human health           | kg NOx eq    | 5.90E-03 | 2.90E-03 | 2.29E-02  | 3.00E-02 | 1.71E-02 | 1.11E-01  |
| Ozone formation, Terrestrial ecosystems | kg NOx eq    | 6.09E-03 | 3.01E-03 | 2.35E-02  | 3.06E-02 | 1.74E-02 | 1.12E-01  |
| Terrestrial acidification               | kg SO2 eq    | 7.99E-03 | 2.92E-03 | 2.77E-02  | 2.35E-02 | 9.30E-03 | 5.54E-02  |
| Fine particulate matter formation       | kg PM2.5 eq  | 2.90E-03 | 1.05E-03 | 9.32E-03  | 1.47E-02 | 6.90E-03 | 4.21E-02  |
| Global warming                          | kg CO2 eq    | 7.06E+00 | 4.52E+00 | 4.15E+01  | 3.58E+00 | 1.25E+00 | 1.42E+01  |
| Marine eutrophication                   | kg N eq      | 1.30E-04 | 8.77E-05 | -1.48E-03 | 2.99E-04 | 1.30E-04 | -1.44E-03 |
| Human non-carcinogenic toxicity         | kg 1,4-DCB   | 1.36E+00 | 3.28E-01 | 5.57E+00  | 1.02E+01 | 3.48E+00 | 1.86E+01  |
| Fossil resource scarcity                | kg oil eq    | 2.65E+00 | 1.63E+00 | 1.26E+01  | 9.60E-01 | 2.58E-01 | 1.68E+00  |
| Freshwater ecotoxicity                  | kg 1,4-DCB   | 1.02E-01 | 2.51E-02 | 3.55E-01  | 9.59E-01 | 2.18E-01 | 5.48E-01  |
| Freshwater eutrophication               | kg P eq      | 5.81E-04 | 1.41E-04 | 1.94E-03  | 1.84E-03 | 4.55E-04 | 2.33E-03  |
| Mineral resource scarcity               | kg Cu eq     | 8.51E-04 | 1.99E-04 | 4.54E-03  | 2.92E-03 | 7.26E-04 | 4.48E-03  |
| Marine ecotoxicity                      | kg 1,4-DCB   | 1.43E-01 | 3.97E-02 | 5.28E-01  | 1.21E+00 | 2.79E-01 | 7.51E-01  |
| Water consumption                       | m3           | 8.95E+00 | 3.59E+00 | 1.04E+02  | 1.11E+02 | 2.86E+01 | 1.44E+02  |
| Land use                                | m2a crop eq  | 3.18E-03 | 1.06E-03 | 5.46E-03  | 3.97E-02 | 1.31E-02 | 5.10E-02  |
| Terrestrial ecotoxicity                 | kg 1,4-DCB   | 5.95E+00 | 1.50E+00 | 2.26E+01  | 5.27E+01 | 1.67E+01 | 7.80E+01  |
| Human carcinogenic toxicity             | kg 1,4-DCB   | 6.55E-02 | 2.25E-02 | 2.73E-01  | 6.77E-01 | 1.57E-01 | 3.70E-01  |

#### 4 Comparison of seaweed biopolymer with commercial alternatives

**Table S2** - Summary of literature values used to generate the comparative bar chart displayed in figure 3. Data is inclusive of studies where LCA was conducted from the cradle-to-gate perspective, specifically from raw material acquisition through to the production of 1 kg of polymer resin/pellet.

| Reference                                | This study |        |          |         |         |          | Renewable |          |     | Fossil  |         |          |          |          |         |
|------------------------------------------|------------|--------|----------|---------|---------|----------|-----------|----------|-----|---------|---------|----------|----------|----------|---------|
|                                          | MS         | ES     | SS       | MG      | EG      | SG       | PHA       | PLA      | TPS | HDPE    | LDPE    | PET      | PP       | PS       | PVC     |
| This study<br>(Gironi and Piemonte 2011) | 7.06086    | 4.5236 | 41.51901 | 3.58485 | 1.24844 | 14.19045 |           | 1.086169 |     |         |         | 2.647536 |          |          |         |
| (Detzel and Krüger 2006)                 |            |        |          |         |         |          |           | 1.860095 |     |         |         | 3.2846   | 1.973609 | 3.494898 |         |
| (Sommerhuber et al. 2017)                |            |        |          |         |         |          |           |          |     | 2.18    |         |          |          |          |         |
|                                          |            |        |          |         |         |          |           |          |     | 0.76    |         |          |          |          |         |
|                                          |            |        |          |         |         |          |           |          |     | 1.73    |         |          |          |          |         |
|                                          |            |        |          |         |         |          |           |          |     | 0.78    |         |          |          |          |         |
| (Yu and Chen 2008)                       |            |        |          |         |         |          | 0.49      |          |     |         |         |          |          |          |         |
| (Akiyama et al. 2003)                    |            |        |          |         |         |          | 0.26      |          |     | 1.7     | 1.9     | 3.1      | 1.9      | 2.6      |         |
|                                          |            |        |          |         |         |          | 0.45      |          |     |         |         |          |          |          |         |
| Ecoinvent<br>(Frischknecht et al. 2005)  |            |        |          |         |         |          |           | 3.11551  |     | 1.99541 | 2.04612 | 2.81805  | 1.97489  | 3.84625  | 1.97374 |
| (Vink et al. 2010)                       |            |        |          |         |         |          |           | 1.3      |     |         | 2.1     | 3.4      | 1.9      | 3.4      | 1.9     |
|                                          |            |        |          |         |         |          |           |          |     |         | 3.2     |          |          |          |         |
| (Fröhlich et al. 2014)                   |            |        |          |         |         |          |           |          |     | 1.8     | 1.87    |          |          |          |         |
|                                          |            |        |          |         |         |          |           |          |     |         | 1.79    |          |          |          |         |
| (Fröhlich et al. 2016)                   |            |        |          |         |         |          |           |          |     |         |         |          | 1.63     |          |         |
| (Hottle et al. 2013)                     |            |        |          |         |         |          |           |          |     | 2       |         |          |          |          |         |
| (Kurdikar et al. 2000)                   |            |        |          |         |         |          |           | -4       |     |         |         |          |          |          |         |
|                                          |            |        |          |         |         |          |           | 3.8      |     |         |         |          |          |          |         |
| (Moretti et al. 2020)                    |            |        |          |         |         |          |           |          |     |         |         |          | 0.63     |          |         |
|                                          |            |        |          |         |         |          |           |          |     |         |         |          | -2.51    |          |         |
| (Madival et al. 2009)                    |            |        |          |         |         |          |           | 1.9646   |     |         |         | 1.9914   |          | 2.8045   |         |
| (Braskem 2016)                           |            |        |          |         |         |          |           |          |     | -3.09   |         |          |          |          |         |



- Akiyama M, Tsuge T, Doi Y (2003) Environmental life cycle comparison of polyhydroxyalkanoates produced from renewable carbon resources by bacterial fermentation. *Polym Degrad Stab* 80:183–194. [https://doi.org/10.1016/S0141-3910\(02\)00400-7](https://doi.org/10.1016/S0141-3910(02)00400-7)
- Braskem (2016) I'm green™ bio-based PE Life Cycle Assessment
- Detzel A, Krüger M (2006) Life Cycle Assessment of PLA - A comparison of food packaging made from NatureWorks® PLA and alternative materials. Final Report.
- Frischknecht R, Jungbluth N, Althaus HJ, et al (2005) The ecoinvent database: Overview and methodological framework. *International Journal of Life Cycle Assessment* 10
- Fröhlich T, Liebich A, Volz S (2014) Eco-profiles and Environmental Product Declarations of the European Plastics Manufacturers - High-density Polyethylene (HDPE), Low-density Polyethylene (LDPE), Linear Low-density Polyethylene (LLDPE). PlasticsEurope AISBL, Brussels
- Fröhlich T, Liebich A, Volz S (2016) Eco-profiles and Environmental Product Declarations of the European Plastics Manufacturers - Polypropylene (PP). Brussels
- Gironi F, Piemonte V (2011) Life cycle assessment of polylactic acid and polyethylene terephthalate bottles for drinking water. *Environ Prog Sustain Energy* 30:459–468. <https://doi.org/10.1002/EP.10490>
- Hottle TA, Bilec MM, Landis AE (2013) Sustainability assessments of bio-based polymers. *Polym Degrad Stab* 98:1898–1907
- Kurdikar D, Fournet L, Slater SC, et al (2000) Greenhouse gas profile of a plastic material derived from a genetically modified plant. *J Ind Ecol* 4:107–122. <https://doi.org/10.1162/108819800300106410>
- Madival S, Auras R, Singh SP, Narayan R (2009) Assessment of the environmental profile of PLA, PET and PS clamshell containers using LCA methodology. *J Clean Prod* 17:.. <https://doi.org/10.1016/j.jclepro.2009.03.015>
- Moretti C, Junginger M, Shen L (2020) Environmental life cycle assessment of polypropylene made from used cooking oil. *Resour Conserv Recycl* 157:104750. <https://doi.org/10.1016/J.RESCONREC.2020.104750>
- Sommerhuber PF, Wenker JL, Rüter S, Krause A (2017) Life cycle assessment of wood-plastic composites: Analysing alternative materials and identifying an environmental sound end-of-life option. *Resour Conserv Recycl* 117:235–248. <https://doi.org/10.1016/J.RESCONREC.2016.10.012>
- Vink ETH, Davies S, Kolstad JJ (2010) The eco-profile for current Ingeo® polylactide production. *Industrial Biotechnology* 6:212–224. <https://doi.org/10.1089/IND.2010.6.212>
- Yu J, Chen LXL (2008) The Greenhouse Gas Emissions and Fossil Energy Requirement of Bioplastics from Cradle to Gate of a Biomass Refinery. *Environ Sci Technol* 42:6961–6966. <https://doi.org/10.1021/ES7032235>

### 5 Sensitivity analysis

**Figure S6** - Sensitivity analysis showing the relative influence of various parameters on potential environmental impacts generated in each standard energy scenario. Parameters assessed included biomass carbohydrate (specifically alginate and cellulose) composition and the market value of the packaging polymer. Parameter inputs were varied at 10% increments within  $\pm 50\%$  of the original input/inventory values.

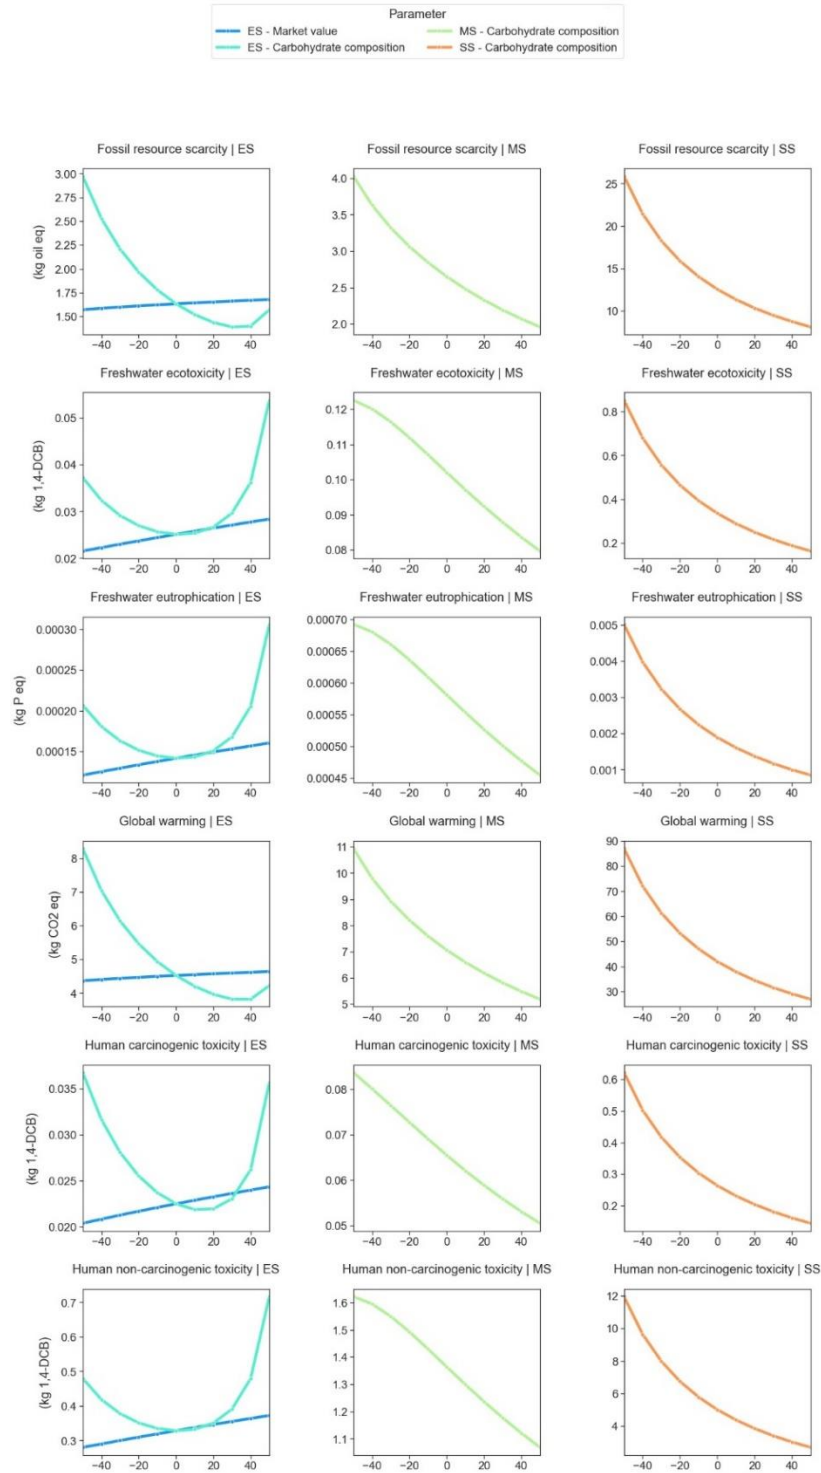

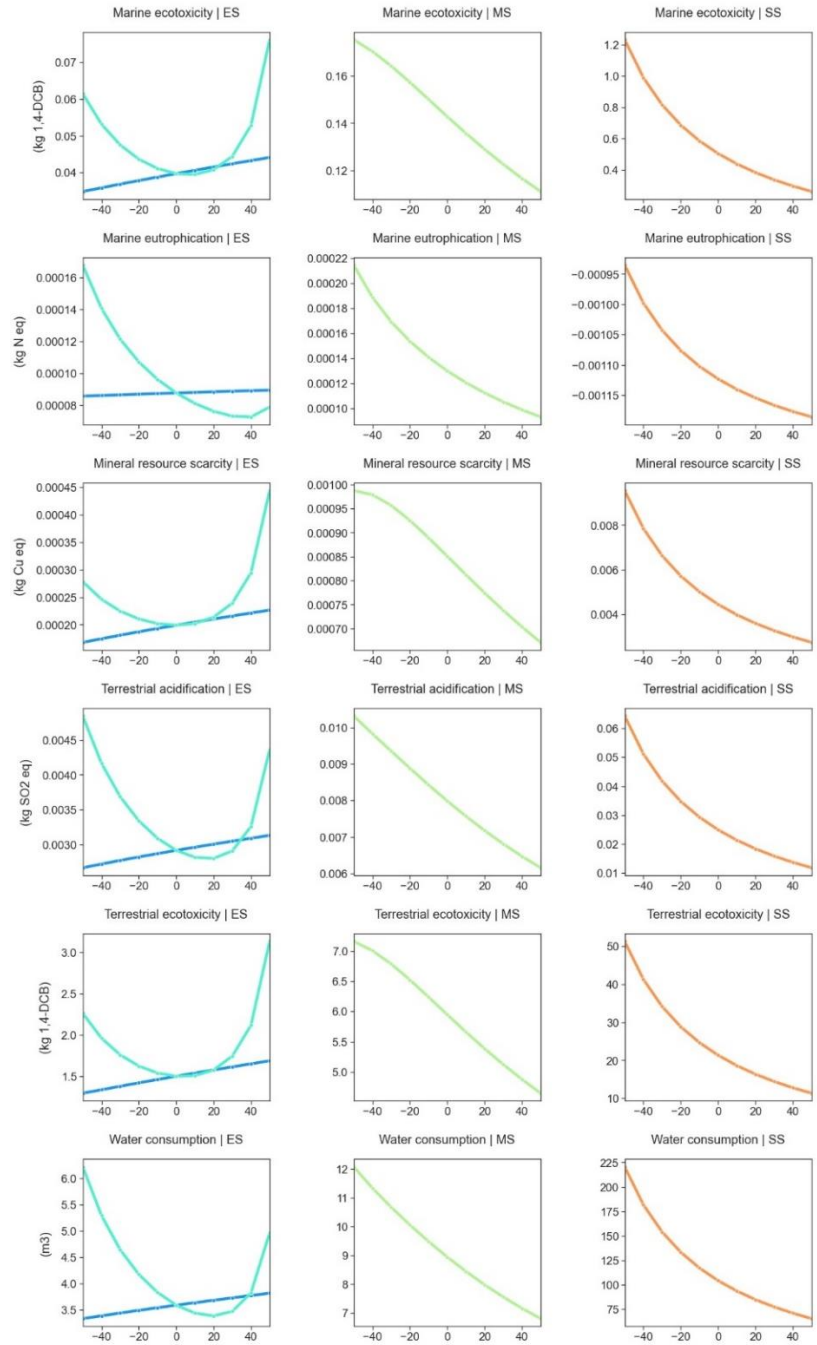

Supplement: MOESM1 [file 26193502]
